# Supplementary material
Source: PubMed Central journal article supplement (PMC3070578)

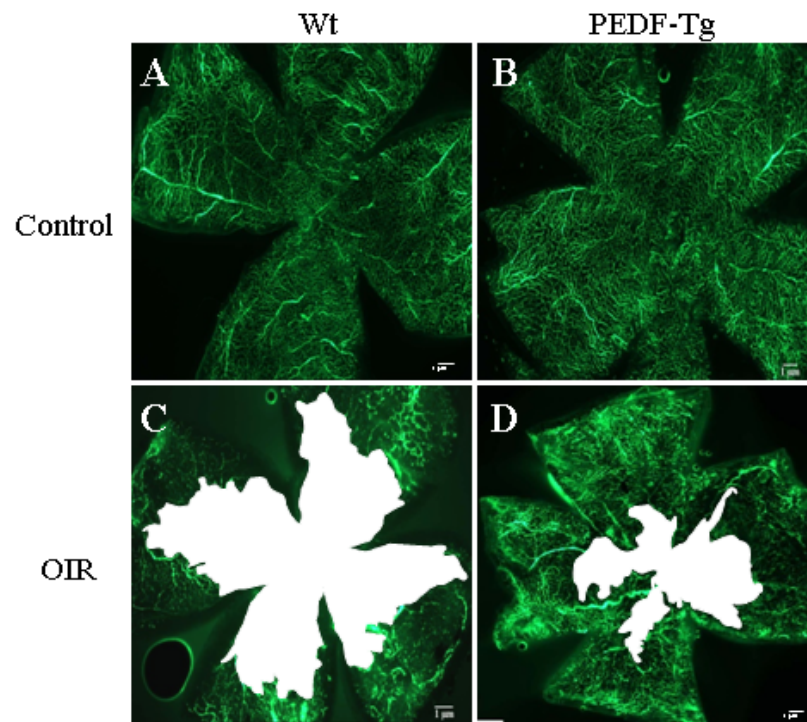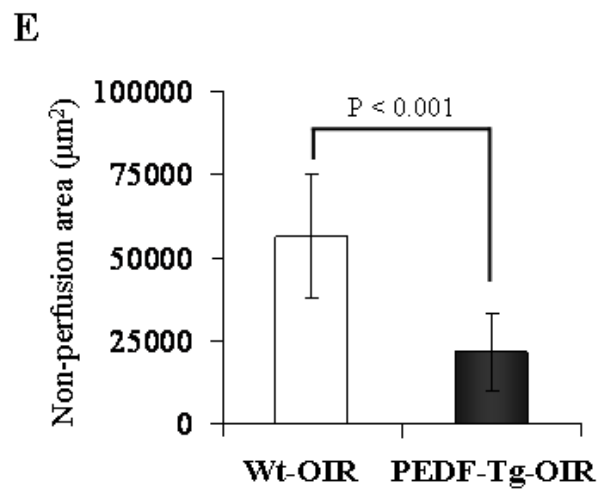

**Supplemental Figure 1**

Supplement: mmc1.pdf [file mmc1.pdf]

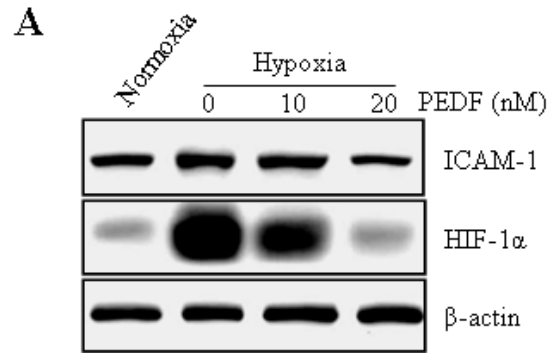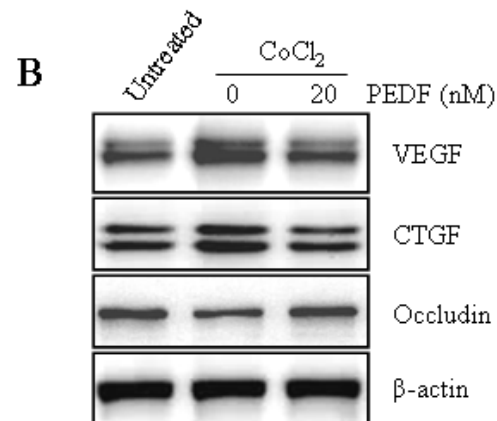

## Supplemental Figure 2

Supplement: mmc2.pdf [file mmc2.pdf]
